# Supplementary material for: Improving ICSI success rates following root cause analysis and use of system behaviour charts: the devil is in the detail!
Source: HighWire-hosted journal article supplement (doi:10.1136/bmjoq-2022-002003), 2022-11-01
Supplement: bmjoq-2022-002003supp001_data_supplement.pdf [file bmjoq-2022-002003supp001_data_supplement.pdf]

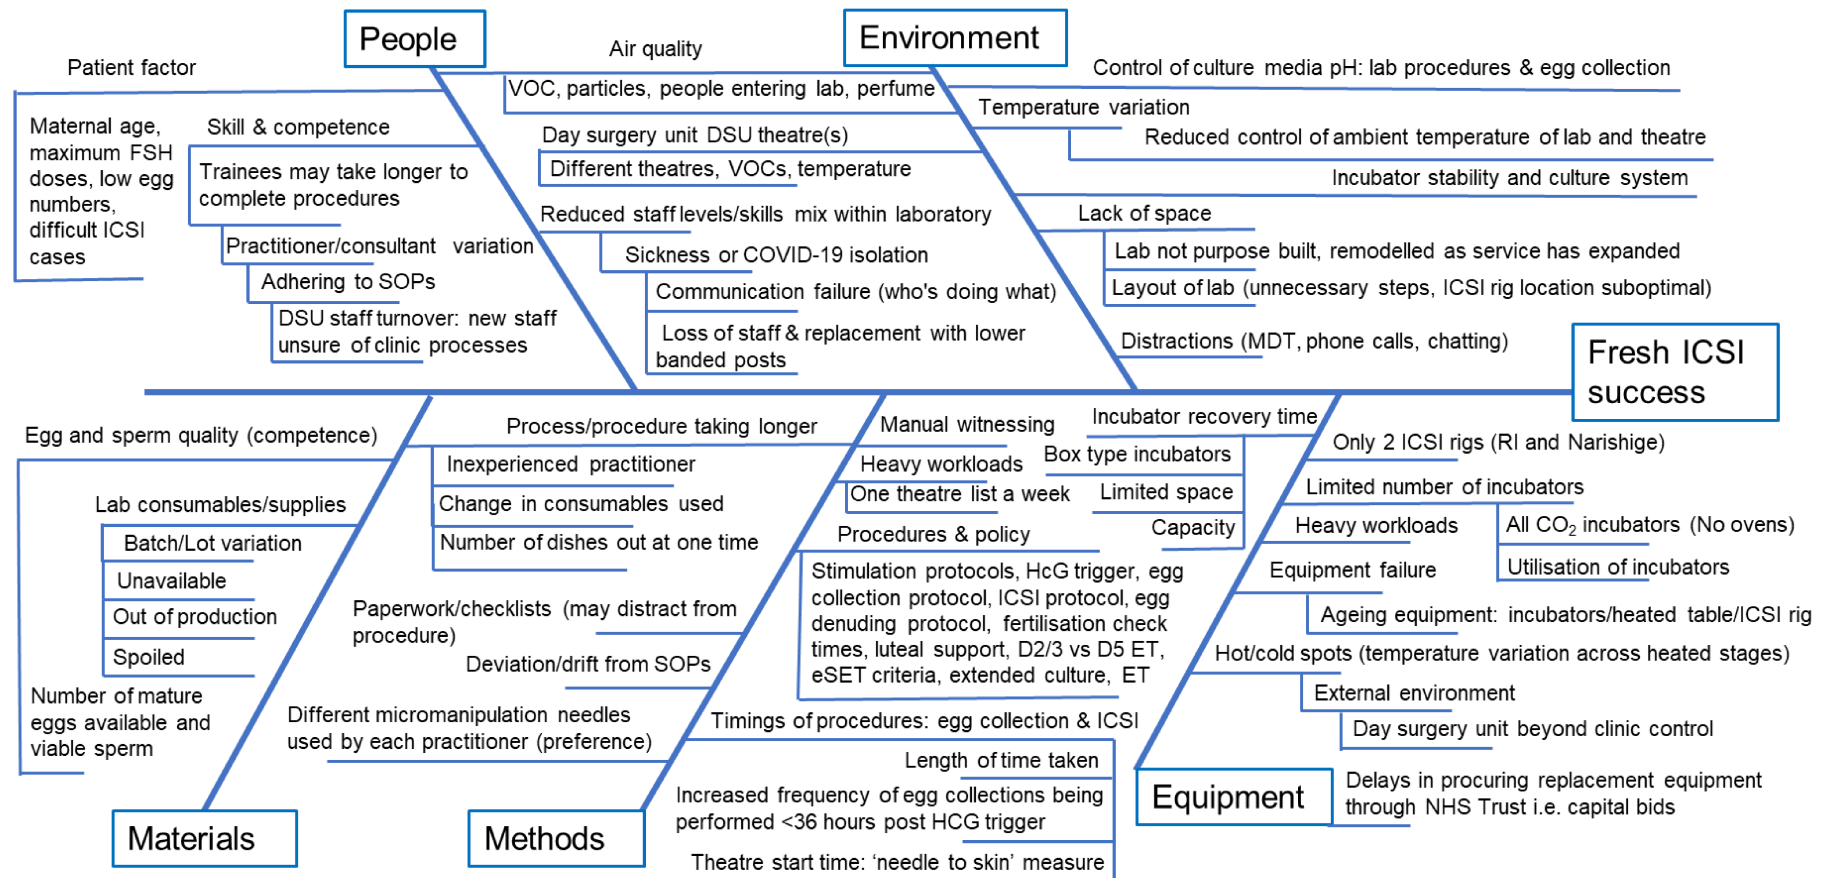

**Online supplemental information 1. Cause and effect fish bone diagram of causal factors that might influence fresh ICSI success rates which were all considered during the root cause analysis**
